# Supplementary material for: The mediating role of C-reactive protein (CRP) in the dietary intake of flavonoids and the risk of albuminuria
Source: Royal Society of Chemistry journal article supplement (doi:10.1039/d4fo03589e), 2024-12-12
Supplement: d4fo03589e1.pdf [file d4fo03589e1.pdf]

### Supplementary Material

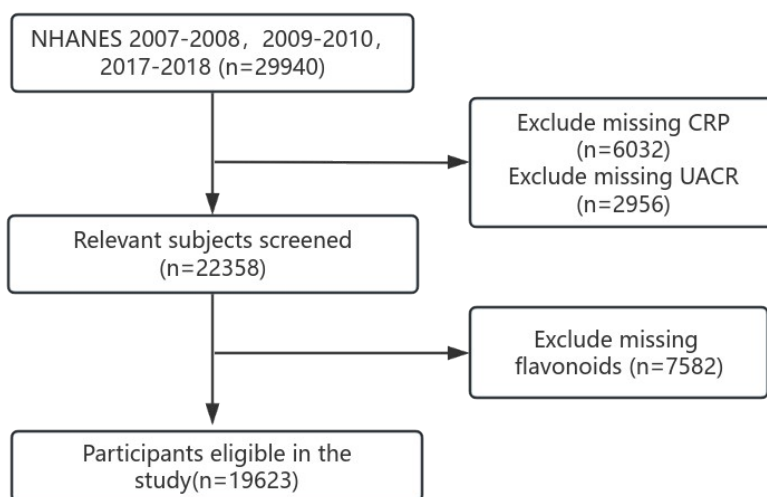

Fig. S1 Flow chart of participants selection.

Table S1 Flavonoids in the Flavonoid Database from United States Department of Food and Nutrient Database for Dietary Studies (FNDDS).

| <i>CLASS</i>          | <i>name</i>                    |
|-----------------------|--------------------------------|
| <i>Anthocyanidins</i> | Cyanidin                       |
|                       | Delphinidin                    |
|                       | Malvidin                       |
|                       | Pelargonidin                   |
|                       | Peonidin                       |
|                       | Petunidin                      |
| <i>Flavan-3-ols</i>   | Catechins                      |
|                       | (-)-Epicatechin                |
|                       | (-)-Epicatechin 4-gallate      |
|                       | (-)-Epigallocatechin           |
|                       | (-)-Epigallocatechin 4-gallate |
|                       | (+)-Catechin                   |
|                       | (+)-Gallocatechin              |
|                       | Theaflavin                     |
|                       | Theaflavin-3,4'-digallate      |
|                       | Theaflavin-4'-gallate          |
|                       | Theaflavin-4-gallate           |
|                       | Thearubigins                   |
|                       | <i>Flavanones</i>              |
| Hesperetin            |                                |
| Naringenin            |                                |
| <i>Flavones</i>       | Apigenin                       |
|                       | Luteolin                       |
| <i>Flavonols</i>      | Isorhamnetin                   |
|                       | Kaempferol                     |
|                       | Myricetin                      |
|                       | Quercetin                      |
| <i>Isoflavones</i>    | Daidzein                       |
|                       | Genistein                      |
|                       | Glycitein                      |

Table S2. Multivariate logistic regression analysis of Log10-transformed flavonoids for the prevalence of albuminuria

|                                | Continuous           | Q1               | Q2                   | Q3                   | Q4                   |
|--------------------------------|----------------------|------------------|----------------------|----------------------|----------------------|
|                                | OR (95% CI)          | OR (95% CI)      | OR (95% CI)          | OR (95% CI)          | OR (95% CI)          |
| Log10 Tota flavonoids (mg)     | 0.92 (0.90, 0.95)*** | 1.00 (reference) | 0.99 (0.88, 1.12)    | 0.90(0.80, 1.02)     | 0.73(0.65, 0.83)***  |
| Log10 Flavonols (mg)           | 0.88(0.85, 0.91)***  | 1.00 (reference) | 0.85 (0.75, 0.95)*** | 0.76 (0.68, 0.86)*** | 0.66 (0.58, 0.75)*** |
| Log10 Flavones (mg)            | 0.93(0.90, 0.96)***  | 1.00 (reference) | 0.80 (0.71, 0.91)*** | 0.77(0.67, 0.87)***  | 0.76(0.66, 0.86)***  |
| Log10 Flavanones (mg)          | 1.00(0.97, 1.02)     | 1.00 (reference) | 0.90(0.77, 1.06)     | 0.87(0.74, 1.02)     | 1.00(0.85, 1.17)     |
| Log10 Flavan 3-ols (mg)        | 0.96(0.94, 0.98)***  | 1.00 (reference) | 0.97(0.85, 1.09)     | 0.89(0.79, 1.01)     | 0.78 (0.68, 0.88)*** |
| Log10 Anthocyanidins (mg)      | 0.97 (0.95, 0.99) *  | 1.00 (reference) | 0.96 (0.82, 1.12)    | 0.92 (0.79, 1.07)    | 0.89 (0.76, 1.04)    |
| Log10 Isoflavones (mg)         | 0.99 (0.96, 1.02)    | 1.00 (reference) | 0.88 (0.73, 1.07)    | 0.96 (0.80,1.17)     | 0.94 (0.78, 1.14)    |
| Log10 Subtotal: Catechins (mg) | 0.95 (0.93, 0.97)*** | 1.00 (reference) | 0.97 (0.85, 1.09)    | 0.92 (0.81, 1.04)    | 0.77(0.67, 0.87)***  |

Models were adjusted for sex, age, race education, family income marital status, body mass index, drinking alcohol status, and smoke status. Continuous, Q, quartile; \* P < 0.05, \*\* P < 0.01, and \*\*\* P < 0.001.

Table S3 CRP as mediators in the log10-transformed favonoid subclass intake and urine protein-creatinine ratio

|                | effect   | $\beta$ | P     | LLCI   | ULCI   | Estimation% |
|----------------|----------|---------|-------|--------|--------|-------------|
|                | Total    | -0.041  | <0.01 | -0.050 | -0.032 |             |
| flavonoids     | Direct   | -0.038  | <0.01 | -0.047 | -0.028 | 92.7%       |
|                | Indirect | -0.003  | <0.01 | -0.040 | -0.020 | 7.3%        |
|                | Total    | -0.071  | <0.01 | -0.084 | -0.058 |             |
| Flavonols      | Direct   | -0.067  | <0.01 | -0.080 | -0.054 | 94.4%       |
|                | Indirect | -0.004  | <0.01 | -0.005 | -0.003 | 5.6%        |
|                | Total    | -0.044  | <0.01 | -0.056 | -0.034 |             |
| flavones       | Direct   | -0.043  | <0.01 | -0.054 | -0.032 | 97.7%       |
|                | Indirect | -0.001  | <0.01 | -0.002 | -0.001 | 2.3%        |
|                | Total    | -0.022  | <0.01 | -0.029 | -0.015 |             |
| flavan3-ols    | Direct   | -0.021  | <0.01 | -0.029 | -0.015 | 95.4%       |
|                | Indirect | -0.001  | <0.01 | -0.001 | 0.000  | 4.6%        |
|                | Total    | -0.016  | <0.01 | -0.025 | -0.008 |             |
| anthocyanidins | Direct   | -0.016  | <0.01 | -0.025 | -0.008 | 100.0%      |
|                | Indirect | 0.000   | 0.192 | -0.001 | 0.000  | 0.0%        |
|                | Total    | -0.026  | <0.01 | -0.035 | -0.019 |             |
| catechin       | Direct   | -0.024  | <0.01 | -0.019 | -0.017 | 92.3%       |
|                | Indirect | -0.002  | <0.01 | -0.003 | -0.001 | 7.7%        |
|                | Total    | -0.008  | 0.072 | -0.017 | 0.001  |             |
| isoflavones    | Direct   | -0.008  | 0.085 | -0.017 | 0.001  |             |
|                | Indirect | 0.000   | 0.433 | -0.001 | 0.001  |             |
|                | Total    | -0.001  | 0.866 | -0.008 | 0.007  |             |
| flavanones     | Direct   | 0.001   | 0.73  | -0.006 | 0.009  |             |
|                | Indirect | -0.002  | <.001 | -0.003 | -0.001 |             |
